# Supplementary material
Source: PubMed Central journal article supplement (PMC3296453)
Supplement: NIHMS354297-supplement-Methods__Table_S1_and_References.pdf [file NIHMS354297-supplement-Methods__Table_S1_and_References.pdf]

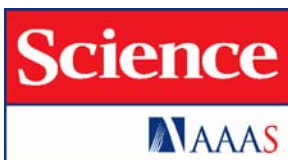

## Supporting Online Material for

### **Formation of the First Peptide Bond: The Structure of EF-P Bound to the 70S Ribosome**

Gregor Blaha, Robin E. Stanley, Thomas A Steitz\*

\*To whom correspondence should be addressed. E-mail: [thomas.steitz@yale.edu](mailto:thomas.steitz@yale.edu)

Published 14 August 2009, *Science* **325**, 966 (2009)

DOI: 10.1126/science.1175800

#### **This PDF file includes**

Materials and Methods  
Table S1  
References

**Other Supporting Online Material for this manuscript includes the following:**  
(available at [www.sciencemag.org/cgi/content/full/325/5940/966/DC1](http://www.sciencemag.org/cgi/content/full/325/5940/966/DC1))

Movie S1

## Supporting Online Material

### Materials and Methods

#### Construction of EF-P overexpression clone and purification of EF-P

The entire gene of *efp* was PCR amplified from genomic DNA of *Thermus thermophilus* (*T. th.*) (American Type Culture Collection, Manassas, VA) with primers that introduced upstream NdeI and downstream XhoI sites. An N-terminal His Tag was appended to the gene by site directed cloning into the *pET14b* vector (Novagen, Madison, WI). The pET14b-*efp* construct was transformed into *E. coli* BL21(AI) cells (Invitrogen, Grand Island, NY). Cells were grown in LB medium in the presence of 100 mg/L of ampicillin to an absorbance of 0.6 at 600 nm before inducing protein overexpression with 1 mM IPTG and 0.2 % (w/v) arabinose for four hours. The harvested cells were resuspended in lysis buffer (20 mM Hepes (pH 7.6), 10 mM MgCl<sub>2</sub>, 50 mM KCl, 10 mM NH<sub>4</sub>Cl), lysed by multiple passes through a microfluidizer (15 000 psi, Microfluidics, Newton, MA) and centrifuged to remove the cell debris (30 minutes at 25 000 rcf). After a 20-minute heat treatment (65°C) the lysate was centrifuged (90 minutes 250 000 rcf) and loaded onto a HisTrap HP column (GE-Healthcare, Piscataway, NJ). EF-P was eluted from the HisTrap column by a linear gradient from 0 to 500 mM imidazole. The fractions containing EF-P were combined, concentrated and loaded onto a HiLoad 26/60 Superdex 75 column (GE-Healthcare, Piscataway, NJ) equilibrated in 20 mM Hepes (pH 7.6), 10 mM MgCl<sub>2</sub>, 50 mM KCl, 10 mM NH<sub>4</sub>Cl, 2 mM DTT). The purified EF-P fractions from the gel filtration column were pooled, and concentrated by ultrafiltration (Amicon-Ultra 15, 10 kDa MWCO, Millipore, Philadelphia, PA) to 20 mg/ml as determined by the Bradford assay (BioRad, Melville, NY) using BSA as a standard. EF-P was flash frozen in liquid nitrogen in small aliquots and stored at -80°C until further use in crystallization experiments.

#### mRNA and fMet-tRNA<sub>i</sub><sup>fMet</sup>

A short piece of mRNA, Tth 32 MNF, was synthesized chemically by Integrated DNA Technologies (Coralville, IA). The mRNA sequence was modified from (S1) and included a Shine Dalgarno sequence and an AUG start codon (5' C AAG GAG GUA AAA AUG CAG UUC 3'). The fMet-tRNA<sub>i</sub><sup>fMet</sup> was prepared as described previously (S2).

#### Purification of *Thermus thermophilus* 70S

*Thermus thermophilus* 70S were prepared as described previously (S1). The final 70S pellets were resuspended in 5 mM Hepes-KOH (pH 7.6), 10 mM MgCl<sub>2</sub>, 50 mM KCl, 10 mM NH<sub>4</sub>Cl, 2 mM βME, at a concentration of approximately 500 A260 units/ml and stored in small aliquots at -80°C until use in crystallization experiments.

#### Complex Formation

The EF-P ribosome complex was formed by programming 4 μM 70S ribosomes with 8 μM 32 Tth 32 MNF mRNA and 8 μM of fMet tRNA<sub>i</sub><sup>fMet</sup> followed by an incubation with 20 μM EF-P. Each step was allowed to reach equilibrium by a 15- to 30-minute incubation at 55°C. A precipitate formed immediately after addition of EF-P to the 70S reaction mixture, which dissolved completely during the final incubation. The final ionic conditions contained 5 mM Hepes-KOH (pH 7.6), 10 mM MgCl<sub>2</sub>, 50 mM KCl, and 10

mM NH<sub>4</sub>Cl. The formed complex was stored at room temperature and was briefly centrifuged prior to use in crystallization experiments.

### Crystallization

Initial crystalline needles were obtained by screening around previously published ribosome crystallization conditions (S1, S3–S5). Crystals were grown by hanging drops, with 1–2 μL of the ribosome complex were mixed with 1–2 μL of reservoir solution (0.1–0.2 M Arg-HCl, 0.1 M Tris-HCl (pH 7.6), 2.5% [w/v] PEG 20K, 7–12% [v/v] MPD, 0.5 mM βME). Within 2–5 days the crystals reached typical dimensions of 50 x 100 x 1000 μm. After slowly increasing the concentration of MDP to a final concentration of 30%, the crystals were flash frozen in liquid nitrogen or liquid propane.

### Data Collection and Refinement

Diffraction data were collected at the beamlines X29 at Brookhaven National Laboratory (Upton, NY) and 24ID at the Advanced Photon Source (Argonne, IL). A complete dataset was collected from seven separate regions of the same crystal. The raw data were processed and scaled with both the HKL (S6) and the XDS program package (S7). The crystal belongs to the orthorhombic space group  $P2_12_12_1$  with unit cell dimensions of  $a = 210$ ,  $b = 451$ ,  $c = 622$  Å and has two ribosomal complexes in the asymmetric unit cell.

The structure was solved by molecular replacement using the program Phaser from the CCP4 program suite (S8) with the small and the large ribosomal subunit from the previously published structure of *T. th.* 70S ribosome with bound mRNA and tRNA (S1). Both the mRNA and the tRNA were excluded from the search model. The molecular replacement solution was refined by rigid body refinement using multiple domains for each subunit (S9). Clear density for the fMet-tRNA<sub>i</sub><sup>Met</sup>, EF-P, and mRNA was visible in the  $F_{\text{obs}} - F_{\text{calc}}$  difference map calculated after the initial round of refinement. The structure was further refined in Phenix to generate the  $F_{\text{obs}} - F_{\text{calc}}$  difference map used for building (S10).

### Structure Building

The initial model of EF-P was derived from the published crystal structure of EF-P from *Thermus thermophilus* [(S11) PDB ID: 1ueb]. All three beta barrel domains of EF-P were clearly visible in the initial  $F_{\text{obs}} - F_{\text{calc}}$  difference map, with the exception of a loop at the end of domain III (residues 140–146). The overall shape of EF-P bound to the 70S ribosome is quite similar to the *apo* crystal structure (S11). Superposition of the N-terminal domain of the *apo* with the ribosome bound EF-P structure (rmsd of 0.81 Å for 66 c-alpha atoms) revealed that domains two and three rotate 10 degrees away from domain I upon binding.

The initial coordinates for the ribosomal protein L1 were derived from the published crystal structure of *T. th.* L1 [(S12) PDB ID: 1ad2] and manually fit into the initial  $F_{\text{obs}} - F_{\text{calc}}$  difference map. The majority of the rRNA for the L1 stalk had to be rebuilt, because of large conformational changes. The initial model of the initiator tRNA was derived from the previously published structure of the *T. th.* 70S ribosome with bound mRNA and tRNA (S1). Only the AUG start codon and two upstream bases were built and refined, because the rest of the mRNA was disordered. The final model was generated by multiple rounds of model building in Coot (S13), followed by refinement with CNS (S14, S15) and PHENIX (S10).

**Table S1: Data Collection and Refinement Statistics**

| <b>Data Collection</b>                |                           |
|---------------------------------------|---------------------------|
| Space group                           | $P2_12_12_1$              |
| Cell dimensions                       | 209.5 x 447.0 x 622.8 (Å) |
| Resolution (Å)*                       | 50–3.3 (3.4–3.3)          |
| $I/\sigma(I)$                         | 4.7 (1.2) <sup>†</sup>    |
| $R_{\text{sym}}$ (%)                  | 23.6 (97.1) <sup>‡</sup>  |
| No. of unique reflections             | 989777                    |
| Completeness (%)                      | 96 (75.8)                 |
| Redundancy                            | 4.4 (2.8)                 |
| <b>Refinement<sup>§</sup></b>         |                           |
| Resolution                            | 50–3.3 (3.4–3.3)          |
| $R_{\text{work}}/R_{\text{free}}$ (%) | 25.7/30.3 (32.7/35.6)     |
| No. of atoms                          | 289467                    |
| RMS deviations                        |                           |
| Bond lengths                          | 0.009                     |
| Bond angles                           | 1.901                     |

\* Parentheses indicate statistics from the outer shell.

<sup>†</sup>  $I/\sigma(I) = 2$  at 3.5 Å.

<sup>‡</sup> The value for  $R_{\text{sym}}$  is higher than normal, most likely because the data were collected with a small degree of oscillation from multiple wedges that were scaled together, and is in the range for  $R_{\text{sym}}$  values reported for other 70S structures.

<sup>§</sup> Refinement was carried out in PHENIX and CNS.

## References

- S1. M. Selmer *et al.*, *Science* **313**, 1935 (Sep 29, 2006).
- S2. R. Junemann *et al.*, *Nucleic Acids Res* **24**, 907 (Mar 1, 1996).
- S3. B. S. Schuwirth *et al.*, *Science* **310**, 827 (Nov 4, 2005).
- S4. S. Petry *et al.*, *Cell* **123**, 1255 (Dec 29, 2005).
- S5. A. Korostelev, S. Trakhanov, M. Laurberg, H. F. Noller, *Cell* **126**, 1065 (Sep 22, 2006).
- S6. Z. a. W. M. Otwinowski, *Methods in Enzymology:Macromolecular Crystallography* **276**, 307 (1997).
- S7. W. Kabsch, *J Appl Cryst* **26**, 795 (1993).
- S8. A. J. G.-K. McCoy, R.W., Adams, P.D, Winn, M.D., Storoni, L.C., and Read, R.J., *J Appl Cryst* **40**, 658 (2007).
- S9. G. N. Murshudov, A. A. Vagin, E. J. Dodson, *Acta Crystallogr D Biol Crystallogr* **53**, 240 (May 1, 1997).
- S10. P. D. Adams *et al.*, *Acta Crystallogr D Biol Crystallogr* **58**, 1948 (Nov, 2002).
- S11. K. Hanawa-Suetsugu *et al.*, *Proc Natl Acad Sci U S A* **101**, 9595 (Jun 29, 2004).
- S12. J. Unge *et al.*, *FEBS Lett* **411**, 53 (Jul 7, 1997).
- S13. P. Emsley, K. Cowtan, *Acta Crystallogr D Biol Crystallogr* **60**, 2126 (Dec, 2004).
- S14. A. T. Brunger *et al.*, *Acta Crystallogr D Biol Crystallogr* **54**, 905 (Sep 1, 1998).
- S15. A. T. Brunger, *Nat Protoc* **2**, 2728 (2007).
